# Supplementary material for: Synthesis and Evaluation of Peptide–Manganese Dioxide Nanocomposites as Adsorbents for the Removal of Strontium Ions
Source: MDPI journal article supplement (doi:10.3390/nano14010052), 2023-12-23
Supplement: s1 [file s1]

## **Supporting Information for**

### **Synthesis and Evaluation of Peptide–Manganese Dioxide Nanocomposites as Adsorbents for the Removal of Strontium Ions**

**Xingjie Lu <sup>1,2</sup>, Zhen Liu <sup>1</sup>, Wentao Wang <sup>2</sup>, Xin Wang <sup>1</sup>, Hongchao Ma <sup>1,\*</sup> and Meiwen Cao <sup>1,\*</sup>**

<sup>1</sup> State Key Laboratory of Heavy Oil Processing and Department of Biological and Energy Chemical Engineering, College of Chemical Engineering, China University of Petroleum (East China), 66 Changjiang West Road, Qingdao 266580, China

<sup>2</sup> Department of Radiochemistry, China Institute of Atomic Energy, Beijing 102413, China

\* Correspondence: mahc@upc.edu.cn (H.M.); mwcao@upc.edu.cn (M.C.)

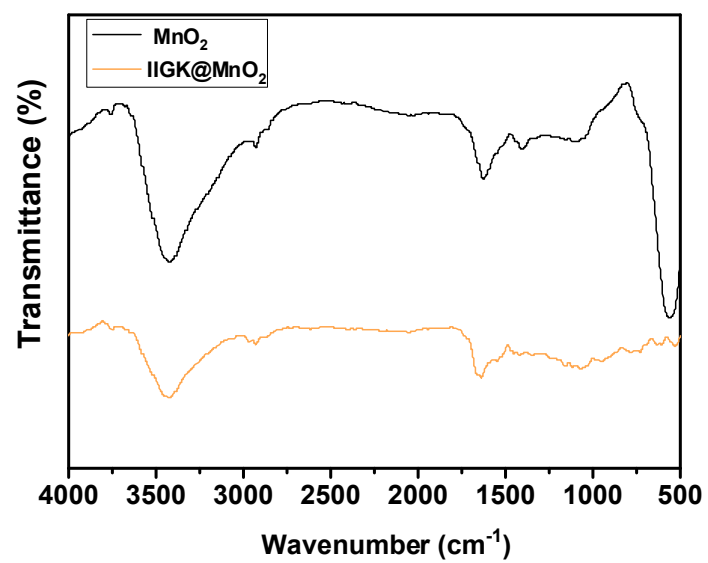

**Figure S1.** FTIR spectra of IIGK@MnO<sub>2</sub> and MnO<sub>2</sub>.
